# Supplementary material for: High-Fat Diet Increases Amylin Accumulation in the Hippocampus and Accelerates Brain Aging in hIAPP Transgenic Mice
Source: PubMed Central journal article supplement (PMC6718729; doi:10.3389/fnagi.2019.00225), 2019-08-27
Supplement: Image_1.pdf [file Image_1.pdf]

## Supplemental Figures

### Supplemental Figure 1

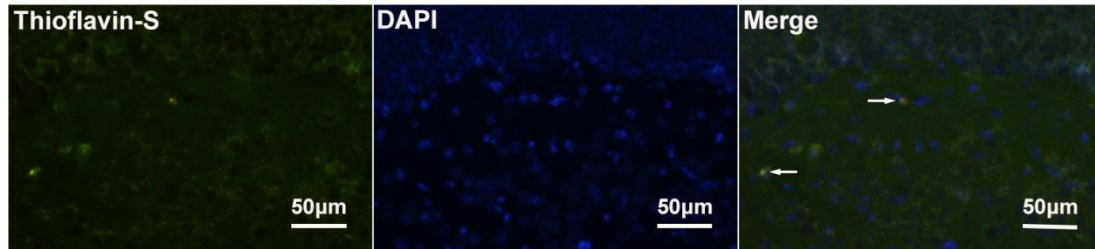

**Figure S1. Thioflavin-S staining in hippocampus of hIAPP<sup>-/+</sup> mice fed with a high-fat diet for 12 months.** Representative images of Thioflavin-S positive staining in the hippocampal of hIAPP<sup>+/-</sup> mice fed with a high-fat diet for 12 months. Green staining indicate the Thioflavin-S positive staining, blue staining indicate the nucleus, White arrows indicate Thioflavin-S positive staining.

### Supplemental Figure 2

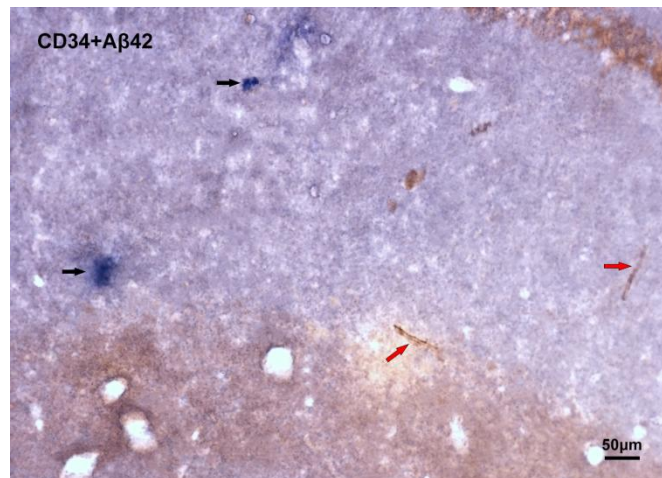

**Figure S2. CD34 and A $\beta$ 42 immunohistochemical staining in hippocampus of hIAPP<sup>-/+</sup> mice fed with a high-fat diet for 12 months.** Representative images of CD34 (vascular endothelial cells) and A $\beta$ 42 positive staining in the hippocampal of hIAPP<sup>+/-</sup> mice fed with a high-fat diet for 12 months. Black arrows indicate A $\beta$ 42 positive staining, red arrows indicate CD34 positive staining.
